# Supplementary material
Source: PubMed Central journal article supplement (PMC6898742)
Supplement: NIHMS1040209-supplement-Supp_info.pdf [file NIHMS1040209-supplement-Supp_info.pdf]

**Title**

Genetic model of MS severity predicts future accumulation of disability

**Authors**

Kayla C. Jackson, BS<sup>1</sup>, Katherine Sun, BS<sup>1</sup>, Christopher Barbour PhD<sup>1,2</sup>, Dena Hernandez, PhD<sup>3</sup>, Peter Kosa, PhD<sup>1</sup>, Makota Tanigawa, BS<sup>1</sup>, Ann Marie Weideman, MS<sup>1</sup>, Bibiana Bielekova, MD<sup>1</sup>

**Affiliations**

<sup>1</sup>Neuroimmunological Diseases Section, National Institute of Allergy and Infectious Diseases, National Institutes of Health, Bethesda, MD

<sup>2</sup>Department of Mathematical Sciences, Montana State University, Bozeman, MT

<sup>3</sup>Laboratory of Neurogenetics, National Institute of Aging, National Institutes of Health, Bethesda, MD

## **Table of Contents**

### **Additional Information**

References 3

Summary of all variants analyzed 7

### **Further Analysis**

Exploring the Cumulative Genetic Risk Score 9

## Supplemental References

1. Comabella M, Caminero AB, Malhotra S, et al. TNFRSF1A polymorphisms rs1800693 and rs4149584 in patients with multiple sclerosis. *Neurology* 2013;80:2010-2016.
2. Baranzini SE, Wang J, Gibson RA, et al. Genome-wide association analysis of susceptibility and clinical phenotype in multiple sclerosis. *Hum Mol Genet* 2009;18:767-778.
3. Pan G, Simpson S, Jr., van der Mei I, et al. Role of genetic susceptibility variants in predicting clinical course in multiple sclerosis: a cohort study. *J Neurol Neurosurg Psychiatry* 2016;87:1204-1211.
4. Masterman T, Ligiers A, Olsson T, Andersson M, Olerup O, Hillert J. HLA-DR15 is associated with lower age at onset in multiple sclerosis. *Ann Neurol* 2000;48:211-219.
5. Consortium IMSG, Consortium aWTCC, Sawcer S, et al. Genetic risk and a primary role for cell-mediated immune mechanisms in multiple sclerosis. *Nature* 2011;476:214-219.
6. Nischwitz S, Cepok S, Kroner A, et al. Evidence for VAV2 and ZNF433 as susceptibility genes for multiple sclerosis. *J Neuroimmunol* 2010;227:162-166.
7. Lin X, Deng FY, Mo XB, Wu LF, Lei SF. Functional relevance for multiple sclerosis-associated genetic variants. *Immunogenetics* 2015;67:7-14.
8. Wang JH, Pappas D, De Jager PL, et al. Modeling the cumulative genetic risk for multiple sclerosis from genome-wide association data. *Genome Medicine* 2011;3:3.
9. Andlauer TFM, Buck D, Antony G, et al. Novel multiple sclerosis susceptibility loci implicated in epigenetic regulation. *Science Advances* 2016;2.
10. De Jager PL, Jia X, Wang J, et al. Meta-analysis of genome scans and replication identify CD6, IRF8 and TNFRSF1A as new multiple sclerosis susceptibility loci. *Nat Genet* 2009;41:776-782.

11. Jakkula E, Leppa V, Sulonen AM, et al. Genome-wide association study in a high-risk isolate for multiple sclerosis reveals associated variants in STAT3 gene. *Am J Hum Genet* 2010;86:285-291.
12. Patsopoulos NA, Bayer Pharma MSGWG, Steering Committees of Studies Evaluating I-b, et al. Genome-wide meta-analysis identifies novel multiple sclerosis susceptibility loci. *Ann Neurol* 2011;70:897-912.
13. Consortium TIMSG. Risk Alleles for Multiple Sclerosis Identified by a Genomewide Study. *New England Journal of Medicine* 2007;357:851-862.
14. Consortium TANZMSG. Genome-wide association study identifies new multiple sclerosis susceptibility loci on chromosomes 12 and 20. *Nat Genet* 2009;41:824-828.
15. Goris A, van Setten J, Diekstra F, et al. No evidence for shared genetic basis of common variants in multiple sclerosis and amyotrophic lateral sclerosis. *Hum Mol Genet* 2014;23:1916-1922.
16. Matesanz F, Gonzalez-Perez A, Lucas M, et al. Genome-wide association study of multiple sclerosis confirms a novel locus at 5p13.1. *PLoS One* 2012;7:e36140.
17. Aulchenko YS, Hoppenbrouwers IA, Ramagopalan SV, et al. Genetic variation in the KIF1B locus influences susceptibility to multiple sclerosis. *Nat Genet* 2008;40:1402-1403.
18. Zhou Y, Zhu G, Charlesworth JC, et al. Genetic loci for Epstein-Barr virus nuclear antigen-1 are associated with risk of multiple sclerosis. *Multiple Sclerosis Journal* 2016;22:1655-1664.
19. Sanna S, Pitzalis M, Zoledziewska M, et al. Variants within the immunoregulatory CBLB gene are associated with multiple sclerosis. *Nat Genet* 2010;42:495-497.

20. Liu J, Liu X, Liu Y, et al. Association of EVI5 rs11808092, CD58 rs2300747, and CIITA rs3087456 polymorphisms with multiple sclerosis risk: A meta-analysis. *Meta Gene* 2016;9:97-103.
21. Goldstein BA, Hubbard AE, Cutler A, Barcellos LF. An application of Random Forests to a genome-wide association dataset: Methodological considerations & new findings. *BMC Genetics* 2010;11:49.
22. Steri M, Orru V, Idda ML, et al. Overexpression of the Cytokine BAFF and Autoimmunity Risk. *N Engl J Med* 2017;376:1615-1626.
23. Brynedal B, Wojcik J, Esposito F, et al. MGAT5 alters the severity of multiple sclerosis. *J Neuroimmunol* 2010;220:120-124.
24. Consortium IMSG. Genome-wide association study of severity in multiple sclerosis. *Genes Immun* 2011;12:615-625.
25. Sadovnick AD, Traboulsee AL, Zhao Y, et al. Genetic modifiers of multiple sclerosis progression, severity and onset. *Clin Immunol* 2017;180:100-105.
26. Dardiotis E, Panayiotou E, Provatas A, et al. Gene variants of adhesion molecules act as modifiers of disease severity in MS. *Neurol Neuroimmunol Neuroinflamm* 2017;4:e350.
27. Hladikova M, Vasku A, Stourac P, Benesova Y, Bednarik J. Two frequent polymorphisms of angiotensinogen and their association with multiple sclerosis progression rate. *J Neurol Sci* 2011;303:31-34.
28. Schmidt S, Pericak-Vance MA, Sawcer S, et al. Allelic association of sequence variants in the herpes virus entry mediator-B gene (PVRL2) with the severity of multiple sclerosis. *Genes Immun* 2006;7:384-392.

29. Schrijver HM, Crusius JBA, Uitdehaag BMJ, et al. Association of interleukin-1 $\beta$  and interleukin-1 receptor antagonist genes with disease severity in MS. *Neurology* 1999;52:595-595.
30. Castaneda-Moreno VA, De la Cruz-Mosso U, Torres-Carrillo N, et al. MIF functional polymorphisms (-794 CATT5-8 and -173 G>C) are associated with MIF serum levels, severity and progression in male multiple sclerosis from western Mexican population. *J Neuroimmunol* 2018;320:117-124.
31. Wagner M, Sobczynski M, Karabon L, et al. Polymorphisms in CD28, CTLA-4, CD80 and CD86 genes may influence the risk of multiple sclerosis and its age of onset. *J Neuroimmunol* 2015;288:79-86.
32. Alatab S, Hossein-nezhad A, Mirzaei K, Mokhtari F, Shariati G, Najmafshar A. Inflammatory profile, age of onset, and the MTHFR polymorphism in patients with multiple sclerosis. *J Mol Neurosci* 2011;44:6-11.
33. van Winsen LM, Manenschijn L, van Rossum EF, et al. A glucocorticoid receptor gene haplotype (TthIII1/ER22/23EK/9beta) is associated with a more aggressive disease course in multiple sclerosis. *J Clin Endocrinol Metab* 2009;94:2110-2114.
34. Klotz L, Schmidt S, Heun R, Klockgether T, Kolsch H. Association of the PPARgamma gene polymorphism Pro12Ala with delayed onset of multiple sclerosis. *Neurosci Lett* 2009;449:81-83.
35. Fazekas F, Strasser-Fuchs S, Kollegger H, et al. Apolipoprotein E  $\epsilon$ 4 is associated with rapid progression of multiple sclerosis. *Neurology* 2001;57:853-857.

| Chr | Variant    | Nearest Gene  | Gene Name                                                                          | Reference |
|-----|------------|---------------|------------------------------------------------------------------------------------|-----------|
| 12  | rs4149584  | TNFRSF1A      | TNF Receptor Superfamily Member 1A                                                 | 1         |
| 5   | rs4704970  | SGCD          | Sarcoglycan Delta                                                                  | 2         |
| 4   | rs10518025 | RP11-584P21.2 | N/A                                                                                | 2         |
| 11  | rs180358   | BUD13         | BUD13 Homolog                                                                      | 2         |
| 8   | rs2116078  | RP11-351E7.1  | N/A                                                                                | 2         |
| 7   | rs17157903 | RELN          | Reelin                                                                             | 2         |
| 9   | rs2842483  | PCSK5         | Proprotein Convertase Subtilisin/Kexin Type 5                                      | 2         |
| 19  | rs299175   | NLRP11        | NLR Family Pyrin Domain Containing 11                                              | 2         |
| 2   | rs1437898  | NCKAP5        | NCK Associated Protein 5                                                           | 2         |
| 7   | rs10243024 | MET           | MET Proto-Oncogene, Receptor Tyrosine Kinase                                       | 2         |
| 22  | rs2283792  | MAPK1         | Mitogen-Activated Protein Kinase 1                                                 | 3         |
| 5   | rs2546890  | IL12B         | Interleukin 12B                                                                    | 3         |
| 16  | rs7191888  | C16orf47      | Chromosome 16 Open Reading Frame 47                                                | 2         |
| 6   | rs6941421  | AL138720.1    | N/A                                                                                | 2         |
| 18  | rs1557351  | LINC-ROR      | Long Intergenic Non-Protein Coding RNA, Regulator Of Reprogramming                 | 2         |
| 3   | rs12638253 | LEKR1         | Leucine, Glutamate And Lysine Rich 1                                               | 2         |
| 11  | rs1386330  | AP005436.1    | N/A                                                                                | 2         |
| 18  | rs337718   | RP11-736G13.1 | N/A                                                                                | 2         |
| 4   | rs1478091  | RP11-401I19.1 | N/A                                                                                | 2         |
| 7   | rs10259085 | C1GALT1       | Core 1 Synthase, Glycoprotein-N-Acetylgalactosamine 3-Beta-Galactosyltransferase 1 | 2         |
| 4   | rs6552511  | TENM3         | Teneurin Transmembrane Protein 3                                                   | 23        |
| 17  | rs7221818  | WSCD1         | WSC Domain Containing 1                                                            | 23        |
| 16  | rs12927173 | XYLT1         | Xylosyltransferase 1                                                               | 23        |
| 16  | rs2059283  | XYLT1         | Xylosyltransferase 1                                                               | 23        |
| 10  | rs1343522  | HIF1AN        | Hypoxia Inducible Factor 1 Subunit Alpha Inhibitor                                 | 23        |
| 2   | rs4953911  | MGAT5         | Mannosyl (Alpha-1,6-)-Glycoprotein Beta-1,6-N-Acetyl-Glucosaminyltransferase       | 23        |
| 10  | rs4573623  | HIF1AN        | Hypoxia Inducible Factor 1 Subunit Alpha Inhibitor                                 | 23        |
| 15  | rs333548   | MEGF11        | Multiple EGF Like Domains 11                                                       | 23        |
| 13  | rs10508075 | FGF14         | Fibroblast Growth Factor 14                                                        | 23        |
| 21  | rs2839580  | PDE9A         | Phosphodiesterase 9A                                                               | 23        |
| 10  | rs2495725  | HIF1AN        | Hypoxia Inducible Factor 1 Subunit Alpha Inhibitor                                 | 23        |
| 2   | rs3814022  | MGAT5         | Mannosyl (Alpha-1,6-)-Glycoprotein Beta-1,6-N-Acetyl-Glucosaminyltransferase       | 23        |
| 7   | rs1078922  | MTPN          | Myotrophin                                                                         | 23        |
| 16  | rs4315313  | CDH13         | Cadherin 13                                                                        | 23        |
| 7   | rs7789940  | YWHAG         | Tyrosine 3-Monooxygenase/Tryptophan 5-Monooxygenase Activation Protein Gamma       | 24        |
| 7   | rs758944   | YWHAG         | Tyrosine 3-Monooxygenase/Tryptophan 5-Monooxygenase Activation Protein Gamma       | 24        |
| 7   | rs17149161 | YWHAG         | Tyrosine 3-Monooxygenase/Tryptophan 5-Monooxygenase Activation Protein Gamma       | 24        |
| 7   | rs7779014  | YWHAG         | Tyrosine 3-Monooxygenase/Tryptophan 5-Monooxygenase Activation Protein Gamma       | 24        |
| 6   | rs11962089 | POPDC3        | Popeye Domain Containing 3                                                         | 24        |
| 4   | rs12644284 | TRIM2         | Tripartite Motif Containing 2                                                      | 24        |
| 2   | rs4848821  | ANAPC1        | Anaphase Promoting Complex Subunit 1                                               | 24        |
| 9   | rs10977017 | PTPRD         | Protein Tyrosine Phosphatase, Receptor Type D                                      | 24        |
| 10  | rs1832745  | RBM20         | RNA Binding Motif Protein 20                                                       | 24        |
| 9   | rs1820314  | IFNA16        | Interferon Alpha 16                                                                | 24        |
| 9   | rs10811505 | IFNA10        | Interferon Alpha 10                                                                | 24        |
| 16  | rs1448239  | GRIN2A        | Glutamate Ionotropic Receptor NMDA Type Subunit 2A                                 | 24        |
| 8   | rs7015570  | PSD3          | Pleckstrin And Sec7 Domain Containing 3                                            | 24        |
| 9   | rs8729     | KLHL9         | Kelch Like Family Member 9                                                         | 24        |
| 7   | rs17170015 | NPSR1         | Neuropeptide S Receptor 1                                                          | 24        |
| 2   | rs10178552 | ASXL2         | ASXL Transcriptional Regulator 2                                                   | 24        |
| 6   | rs17080959 | AKAP12        | A-Kinase Anchoring Protein 12                                                      | 2         |
| 4   | rs987694   | CAMK2D        | Calcium/Calmodulin Dependent Protein Kinase II Delta                               | 2         |
| 20  | rs6089621  | CDH4          | Cadherin 4                                                                         | 2         |
| 8   | rs9644362  | CSMD1         | CUB And Sushi Multiple Domains 1                                                   | 2         |
| 16  | rs205420   | GSG1L         | GSG1 Like                                                                          | 2         |
| 9   | rs2792226  | KDM4C         | Lysine Demethylase 4C                                                              | 2         |

|    |            |               |                                                                              |    |
|----|------------|---------------|------------------------------------------------------------------------------|----|
| 20 | rs10485772 | MACROD2       | MACRO Domain Containing 2                                                    | 2  |
| 7  | rs246462   | MAGI2         | Membrane Associated Guanylate Kinase, WW And PDZ Domain Containing 2         | 2  |
| 6  | rs7349940  | MTHFD1L       | Methylenetetrahydrofolate Dehydrogenase (NADP+ Dependent) 1 Like             | 2  |
| 1  | rs12127450 | AGBL4         | ATP/GTP Binding Protein Like 4                                               | 24 |
| 1  | rs17505688 | NTNG1         | Netrin G1                                                                    | 24 |
| 1  | rs17541777 | PTGER3        | Prostaglandin E Receptor 3                                                   | 24 |
| 2  | rs13019537 | STON1-GTF2A1L | Stonin 1-General Transcription Factor IIA Subunit 1 Like Readthrough         | 24 |
| 2  | rs13387792 | MYT1L         | Myelin Transcription Factor 1 Like                                           | 24 |
| 4  | rs8192678  | PPARGC1A      | PPARG Coactivator 1 Alpha                                                    | 24 |
| 5  | rs11750073 | CTNND2        | Catenin Delta 2                                                              | 24 |
| 6  | rs7744583  | ARID1B        | AT-Rich Interaction Domain 1B                                                | 24 |
| 7  | rs2530548  | NPSR1         | Neuropeptide S Receptor 1                                                    | 24 |
| 7  | rs626065   | RELN          | Reelin                                                                       | 24 |
| 7  | rs11765693 | YWHAG         | Tyrosine 3-Monooxygenase/Tryptophan 5-Monooxygenase Activation Protein Gamma | 24 |
| 8  | rs7812549  | INTS10        | Integrator Complex Subunit 10                                                | 24 |
| 8  | rs10505082 | ZFPM2         | Zinc Finger Protein, FOG Family Member 2                                     | 24 |
| 9  | rs10985528 | TBC1D2        | TBC1 Domain Family Member 2                                                  | 24 |
| 10 | rs2399849  | CAMK1D        | Calcium/Calmodulin Dependent Protein Kinase I Delta                          | 24 |
| 10 | rs2766051  | DOCK1         | Dedicator Of Cytokinesis 1                                                   | 24 |
| 11 | rs1476203  | OR6T1         | Olfactory Receptor Family 6 Subfamily T Member 1                             | 24 |
| 12 | rs7134248  | KDM2B         | Lysine Demethylase 2B                                                        | 24 |
| 15 | rs7167473  | FAM189A1      | Family With Sequence Similarity 189 Member A1                                | 24 |
| 16 | rs8056098  | CLEC16A       | C-Type Lectin Domain Containing 16A                                          | 24 |
| 17 | rs9892479  | ASIC2         | Acid Sensing Ion Channel Subunit 2                                           | 24 |
| 20 | rs4814783  | DTD1          | D-Tyrosyl-TRNA Deacylase 1                                                   | 24 |
| 22 | rs9616098  | CERK          | Ceramide Kinase                                                              | 24 |
| 2  | rs7588193  | LOC100506047  | Uncharacterized LOC100506047                                                 | 3  |
| 2  | rs842639   | LINC01185     | Long Intergenic Non-Protein Coding RNA 1185                                  | 3  |
| 1  | rs35967351 | SLAMF7        | SLAM Family Member 7                                                         | 3  |
| 14 | rs3825568  | ZFP36L1       | ZFP36 Ring Finger Protein Like 1                                             | 3  |
| 17 | rs8070345  | VMP1          | Vacuole Membrane Protein 1                                                   | 3  |
| 6  | rs4959786  | PSMG4         | Proteasome Assembly Chaperone 4                                              | 25 |
| 19 | rs471979   | NLRP5         | NLR Family Pyrin Domain Containing 5                                         | 25 |
| 2  | rs6721763  | ITGA4         | Integrin Subunit Alpha 4                                                     | 26 |
| 4  | rs6532040  | SPP1          | Secreted Phosphoprotein 1                                                    | 26 |
| 2  | rs1250249  | FN1           | Fibronectin 1                                                                | 26 |
| 1  | rs699      | AGT           | Angiotensinogen                                                              | 27 |
| 1  | rs5051     | AGT           | Angiotensinogen                                                              | 27 |
| 19 | rs394221   | PVRL2         | Nectin Cell Adhesion Molecule 2                                              | 28 |
| 19 | rs419010   | PVRL2         | Nectin Cell Adhesion Molecule 2                                              | 28 |
| 19 | rs4803766  | PVRL2         | Nectin Cell Adhesion Molecule 2                                              | 28 |
| 19 | rs2972566  | PVRL2         | Nectin Cell Adhesion Molecule 2                                              | 28 |
| 2  | rs1143634  | IL1B          | Interleukin 1 Beta                                                           | 29 |
| 22 | rs755622   | MIF           | Macrophage Migration Inhibitory Factor                                       | 30 |
| 18 | rs12959006 | MBP           | Myelin Basic Protein                                                         | 36 |
| 2  | rs3116496  | CD28          | CD28 Molecule                                                                | 31 |
| 3  | rs6641     | TIMMDC1       | Translocase Of Inner Mitochondrial Membrane Domain Containing 1              | 31 |
| 3  | rs17281995 | CD86          | CD86 Molecule                                                                | 31 |
| 1  | rs1801133  | MTHFR         | Methylenetetrahydrofolate Reductase                                          | 32 |
| 5  | rs6189     | NR3C1         | Nuclear Receptor Subfamily 3 Group C Member 1                                | 33 |
| 5  | rs10052957 | NR3C1         | Nuclear Receptor Subfamily 3 Group C Member 1                                | 33 |
| 5  | rs6190     | NR3C1         | Nuclear Receptor Subfamily 3 Group C Member 1                                | 33 |
| 5  | rs6198     | NR3C1         | Nuclear Receptor Subfamily 3 Group C Member 1                                | 33 |
| 3  | rs1801282  | PPARG         | Peroxisome Proliferator Activated Receptor Gamma                             | 34 |
| 19 | rs7412     | APOE          | Apolipoprotein E                                                             | 35 |
| 19 | rs429358   | APOE          | Apolipoprotein E                                                             | 35 |



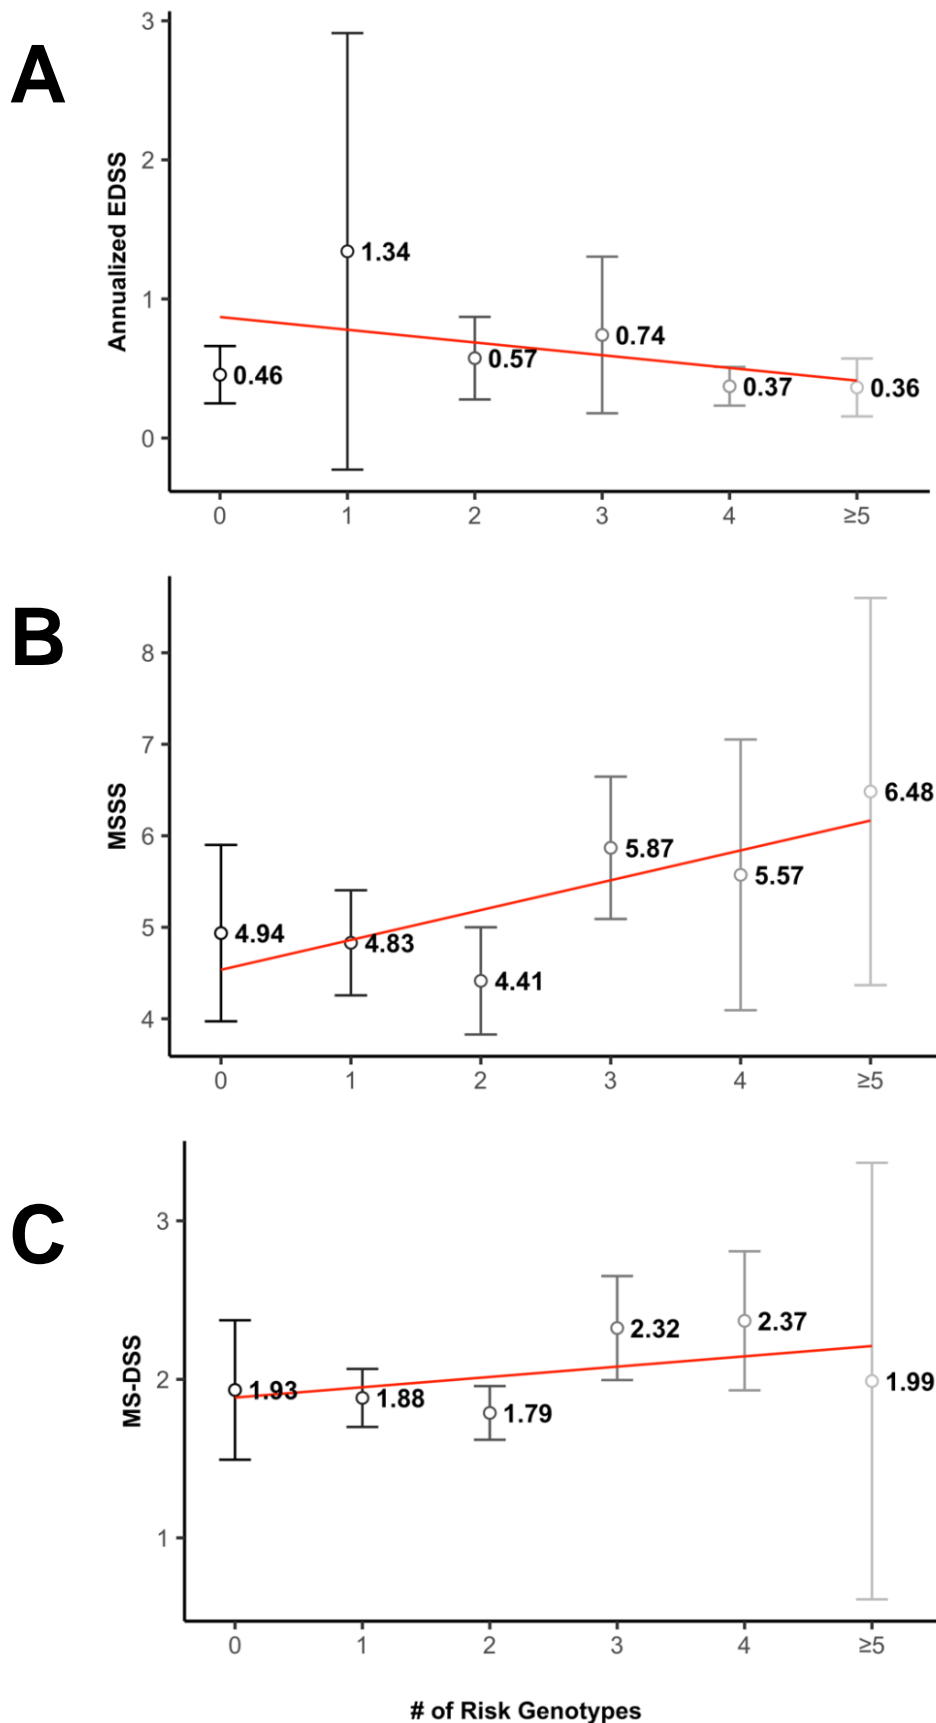

**Supplemental Figure 1** The cumulative genetic risk score (CGRS; (Pan et al., 2016)) aggregates 116 validated MS susceptibility variants in early-MS patients followed over a 5-year period. In contrast to the original publication, we fail to detect a dose-response relationship between the CGRS when predicting (A) annualized Expanded Disability Status Scales (EDSS), or the EDSS-based (B) MS severity score. Similarly, the CGRS did not show a dose-response relationship with the more sensitive severity scale, (C) MS disease severity scale.
